# Supplementary material for: Adaptive engineering of a hyperthermophilic archaeon on CO and discovering the underlying mechanism by multi-omics analysis
Source: PubMed Central journal article supplement (PMC4791640; doi:10.1038/srep22896), 2016-03-15
Supplement: srep22896-s1.pdf [file srep22896-s1.pdf]

1 Supplementary Information

2

3 Adaptive engineering of a hyperthermophilic archaeon on CO and discovering the underlying  
4 mechanism by multi-omics analysis

5

6 Seong Hyuk Lee<sup>1,2,\*</sup>, Min-Sik Kim<sup>3,\*</sup>, Jae-Hak Lee<sup>1,\*</sup>, Tae Wan Kim<sup>1,2</sup>, Seung Seob Bae<sup>1</sup>, Sung-Mok Lee<sup>1</sup>, Hae  
7 Chang Jung<sup>1,2</sup>, Tae-Jun Yang<sup>1</sup>, Ae Ran Choi<sup>1</sup>, Yong-Jun Cho<sup>4</sup>, Jung-Hyun Lee<sup>1,2</sup>, Kae Kyoung Kwon<sup>1,2</sup>,  
8 Hyun Sook Lee<sup>1,2</sup> & Sung Gyun Kang<sup>1,2</sup>

9

10 <sup>1</sup>*Korea Institute of Ocean Science and Technology, Ansan, Republic of Korea.*

11 <sup>2</sup>*Department of Marine Biotechnology, Korea University of Science and Technology, Daejeon, Republic of*  
12 *Korea.*

13 <sup>3</sup>*Korea Institute of Energy Research, Daejeon, Republic of Korea.*

14 <sup>4</sup>*Chunlab, Inc., Seoul, Republic of Korea.*

15 *\*These authors contributed equally to this work.*

16

17 *\* To whom correspondence should be addressed : leeh522@kiost.ac.kr and sgkang@kiost.ac.kr.*

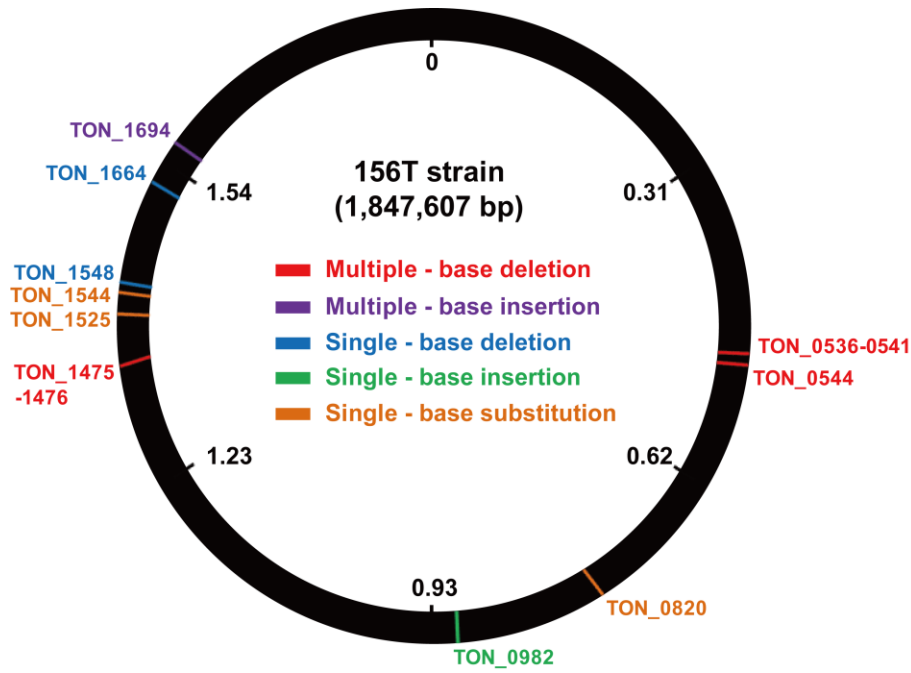

18

19

20 **Supplementary Figure 1. Genomic mutations in the 156T strain.** Mutations were analyzed using High-seq  
 21 2000 and PacBio SMRT DNA sequencers and verified by PCR and Sanger sequencing. The numbers inside and  
 22 outside of the circle represent genome position (Mb) and locus tag, respectively. The mutations are summarized  
 23 in Table 1.

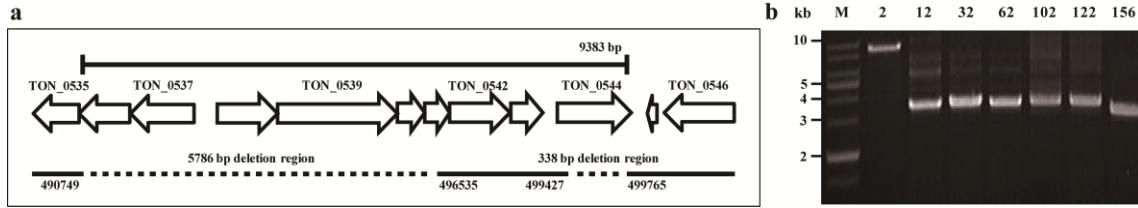

24

25 **Supplementary Figure 2. Verification of the deletion of a long DNA region.** (a) Schematic diagram of a long

26 deletion (9383 bp) region found in the 156T strain. (b) Size analyses of the target sequences amplified from the

27 genomic DNA of each transferred strain. The 5786-bp deletion spanning from 490749 to 496535 was detected in

28 all of the transferred strains, while the 338-bp deletion spanning from 499427 to 499765 was only detected in

29 the 156T strain.

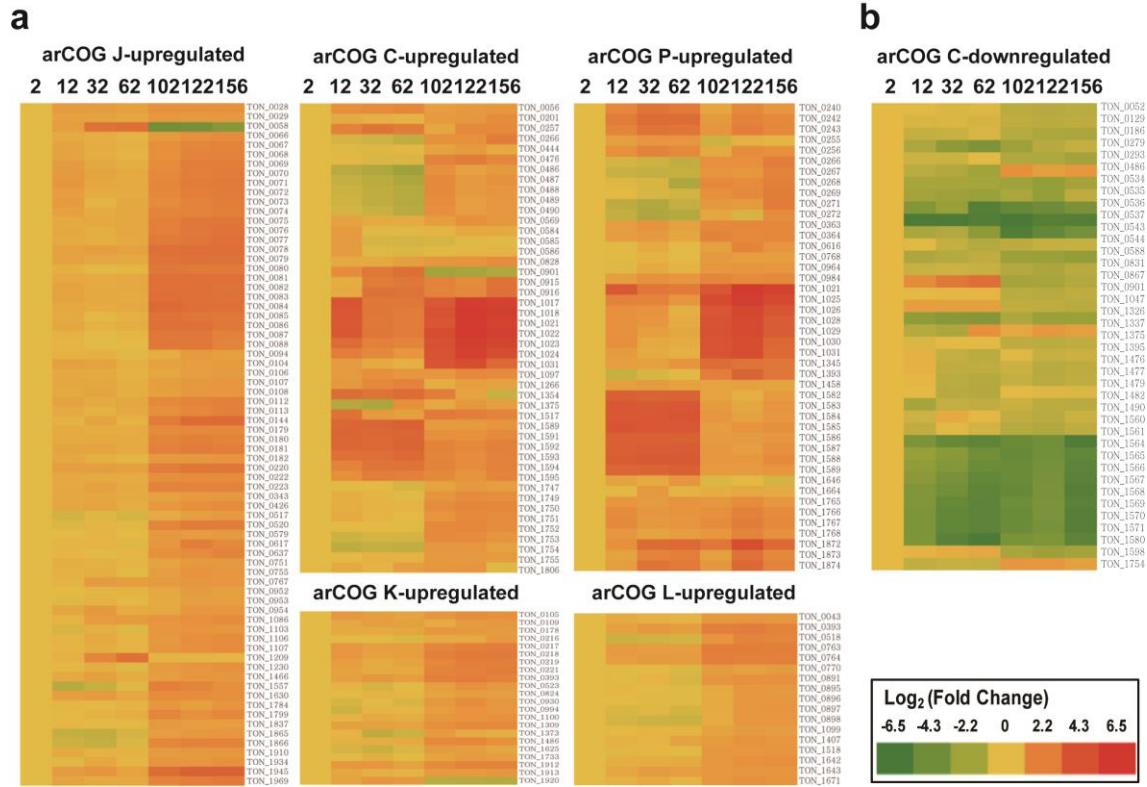

30

31

32 **Supplementary Figure 3. Expression profiles of the genes belonging to archaeal COG J, C, P, K, L (a) and**

33 **C (b). Log<sub>2</sub> (fold change) values were extracted from DESeq data and displayed as a heatmap. The numbers at**

34 **the tops of the heatmaps represent the numbers of times the cells were transferred into the MM1-CO medium.**

35 **The values for TON\_0538, 0540 and 0541 included in arCOG C were omitted because the fold change values**

36 **could not be calculated due to a multiple-base deletion.**

**a****• Genes related to S-layer**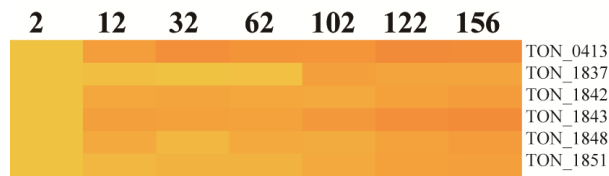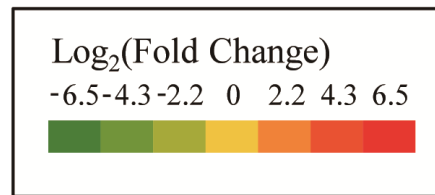**b**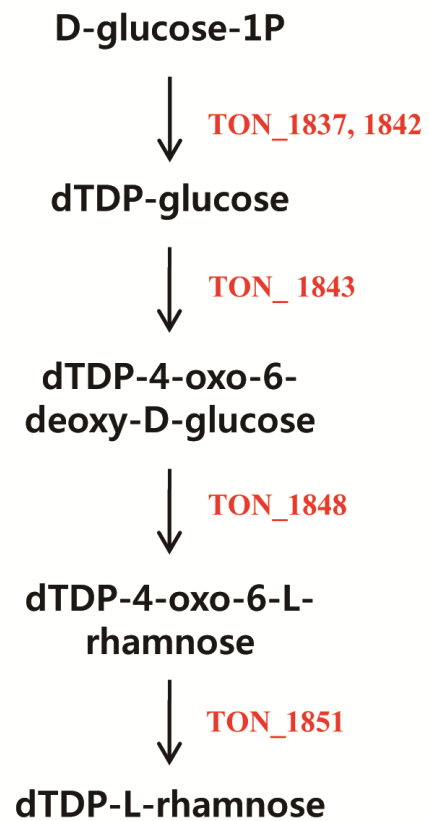

37

38

39 **Supplementary Figure 4.** Transcript patterns of the genes involved in the synthesis of an S-layer. (a) Changes

40 in the transcript levels of genes related to the synthesis of an S-layer are displayed. (b) The pathway for the

41 synthesis of dTDP-L-rhamnose. The gene catalyzing each step is indicated by a locus tag.

|                    |   |      |     |   |   |   |   |
|--------------------|---|------|-----|---|---|---|---|
| NS (10 $\mu$ M)    | - | -    | -   | - | - | - | + |
| S (10 $\mu$ M)     | - | -    | -   | - | - | + | - |
| DNA (100 nM)       | + | +    | +   | + | + | + | + |
| Protein ( $\mu$ M) | 0 | 0.25 | 0.5 | 1 | 2 | 2 | 2 |

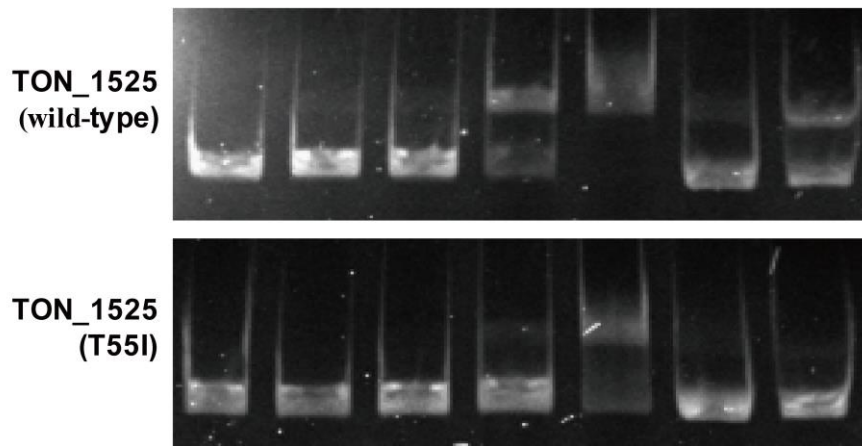

42

43

44 **Supplementary Figure 5. Competition EMSA assay assessing the interactions between the recombinant**

45 **proteins TON\_1525 (wild-type) and TON\_1525 (T55I) and the CODH promoter region.** For competition

46 analysis, NS and S were respectively used as nonspecific and specific DNA competitors in 100X molar excess.

47 NS, a nonspecific cold competitor probe derived from digested pUC18 plasmid DNA; S, a specific cold

48 competitor probe derived from the CODH promoter region.

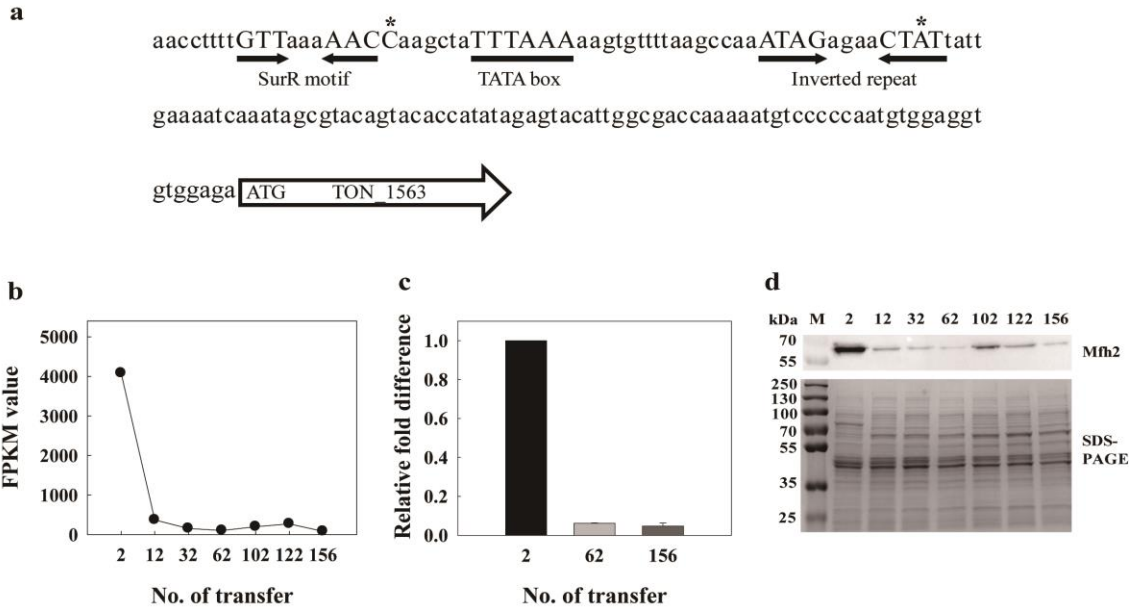

49

50

51 **Supplementary Figure 6. Sequence analysis of the upstream region of the *mfh2* gene cluster and the**

52 **transcript level of the *mfh2* gene during the adaptation process. (a)** The upstream region of the *mfh2* gene

53 cluster, which begins with a TON\_1563 gene, is displayed. The putative SurR-binding motif and a newly found

54 inverted repeat are indicated by two converging arrows. The putative TATA box is underlined. The methylated

55 cytosine and adenine residues that were detected only in the 156T genome are indicated by asterisks. (b) RNA-

56 seq analysis of the *mfh2* (TON\_1569) gene. (c) RT-qPCR analysis of the mRNA abundance of *mfh2*

57 (TON\_1569). (d) Western blot analysis of the Mfh2 subunit (67.2 kDa) encoded by TON\_1569. The error bars

58 indicate the standard deviations from duplicate experiments.

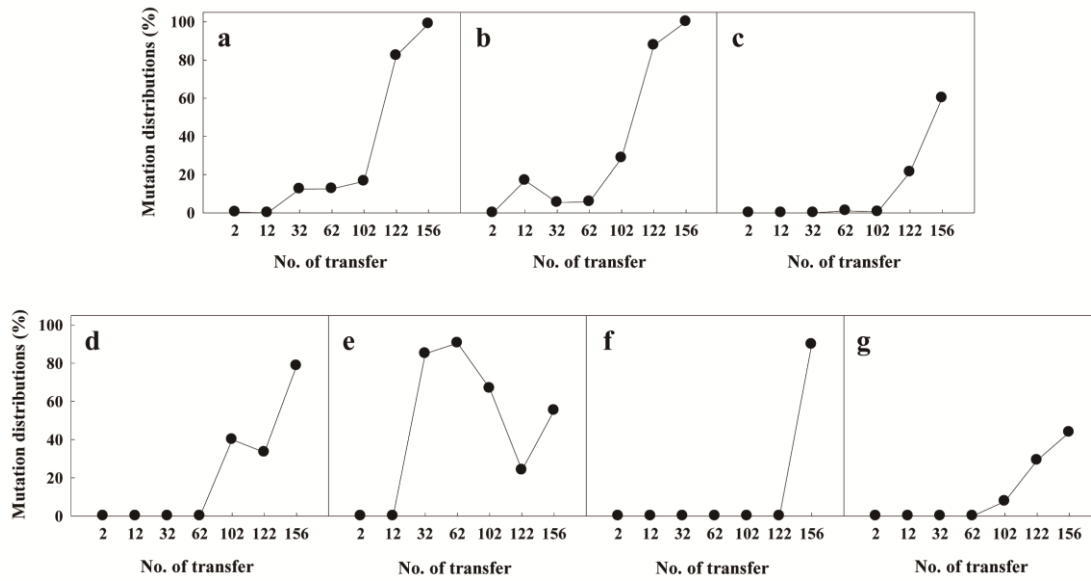

59

60

61 **Supplementary Figure 7. The distributions of mutations in the transferred strains during the adaption**

62 **process.** The distribution pattern of each mutation found in the 156T genome was analyzed using RNA-seq data.

63 The mutation distribution (%) was determined by dividing the mutation read over the total read number of each

64 gene. The following genes were found to have mutations: TON\_1525 (putative transcriptional regulator) (a),

65 TON\_0820 (aromatic amino acid permease) (b), TON\_1544 (membrane protein) (c), TON\_1548 (hypothetical

66 protein) (d), TON\_0982 (aminotransferase) (e), TON\_1664 (cation transporter) (f) and TON\_1694 (membrane-

67 associated metalloprotease) (g).



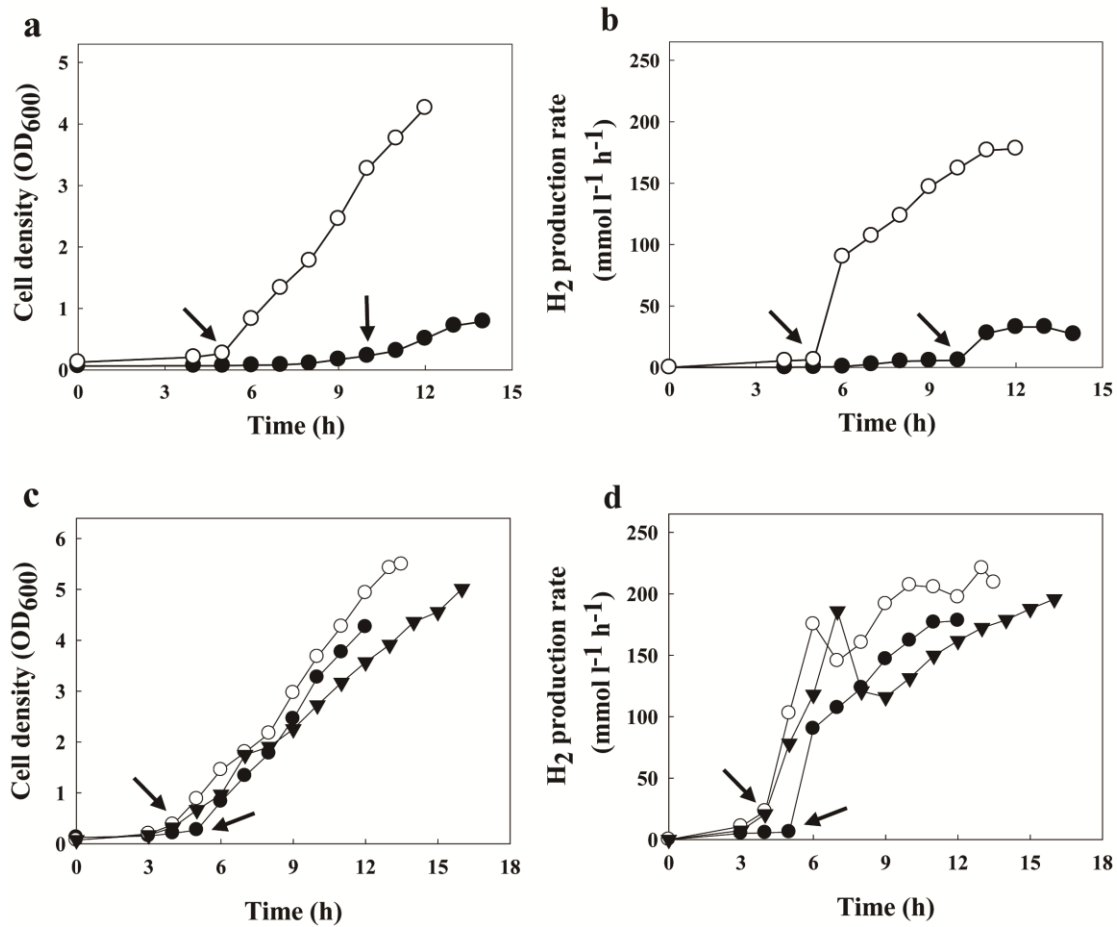

68

69

70 **Supplementary Figure 8. Growth and H<sub>2</sub> production in the 156T strain at various CO flow rates.** Cell

71 density (expressed as optical density at 600 nm) (a) and H<sub>2</sub> production rate (b) of wild-type (closed circle) and

72 156T (open circle) strains were measured under a CO flow rate of 400 ml min<sup>-1</sup>. Cell density (c) and H<sub>2</sub>

73 production rate (d) of the 156T strain were measured under CO flow rates of 400 (closed circle), 800 (open

74 circle) and 1000 ml min<sup>-1</sup> (closed inverted triangle). The initial CO flow rate of 40 ml min<sup>-1</sup> was raised when the

75 OD<sub>600</sub> reached approximately 0.3, as indicated by arrows.

76 **Supplementary Table 1. Frequency of N<sup>6</sup>-methyladenosine in the 2T and 156T strains.**

| Target sequences       | Frequency | 2T   |                     | 156T |                      | Restriction enzyme |
|------------------------|-----------|------|---------------------|------|----------------------|--------------------|
|                        |           | full | hemi                | full | hemi                 |                    |
| GTCGA <sup>m6A</sup> C | 266       | 261  | 5                   | 248  | 15                   | <i>AccI</i>        |
| GTATA <sup>m6A</sup> C | 136       | 125  | 11                  | 116  | 19                   | <i>AccI</i>        |
| GTCTA <sup>m6A</sup> C | 661       | 647  | 2 (12) <sup>a</sup> | 606  | 19 (32) <sup>a</sup> | <i>AccI</i>        |

77 <sup>a</sup>The numbers in the parentheses represent the methylation frequencies of the motif GTAGA<sup>m6A</sup>C, which is

78 reverse and complementary to the motif GTCTA<sup>m6A</sup>C.

79 **Supplementary Table 2. H<sub>2</sub> production rate of the 156T strain with various feeding rates of coal-gasified**  
80 **syngas.**

| Feeding rate of coal-gasified syngas (ml min <sup>-1</sup> ) | H <sub>2</sub> production rate (mmol l <sup>-1</sup> h <sup>-1</sup> ) | Specific H <sub>2</sub> production rate (mmol g <sup>-1</sup> h <sup>-1</sup> ) |
|--------------------------------------------------------------|------------------------------------------------------------------------|---------------------------------------------------------------------------------|
| 160                                                          | 108.2                                                                  | 182.2                                                                           |
| 320                                                          | 167.0                                                                  | 233.2                                                                           |
| 480                                                          | 198.4                                                                  | 254.3                                                                           |
| 640                                                          | 215.4                                                                  | 242.0                                                                           |

81 **Supplementary Table 3. Primers used in this study.**

| <b>Primers</b>                    | <b>Oligonucleotide Sequences</b>          |
|-----------------------------------|-------------------------------------------|
| <b>Construction of mutants</b>    |                                           |
| pUC118_0282del_HMG_fo_inverse_F   | 5'-gacctgcagcatgcaagct-3'                 |
| pUC118_0282del_HMG_fo_inverse_R   | 5'-gactctagaggatccccggg-3'                |
| TON_0820_point mutation_F         | 5'-caaagaacgaggccccgggcaatactc-3'         |
| TON_0820_point mutation_R         | 5'-cccacgagtattgccccgggctctgtt-3'         |
| TON_1525_point mutation_F         | 5'-agaaagctaggaacaccatcaccatctggga-3'     |
| TON_1525_point mutation_R         | 5'-tcccagatggtgatgatgttctagctttct-3'      |
| <b>Confirmation of constructs</b> |                                           |
| TON_0820_F                        | 5'-acagaggtgagagagatgcccgttactgatggaac-3' |
| TON_0820_R                        | 5'-gaaaaaagcaaaggattacttctgagcttgctgg-3'  |
| TON_1525_F                        | 5'-atgggaagtaagagcttcct-3'                |
| TON_1525_R                        | 5'-ctattgctccctatctcat-3'                 |
| TON_1525_F_3'end_A                | 5'-tctgctcccagatggtgatga-3'               |
| TON_1525_flanking_R               | 5'-ggctagaccttgtccagac-3'                 |
| <b>EMSA</b>                       |                                           |
| Labeled_FAM_1017_150_F            | 5'-gagagtttactgtctctaaatgaa-3'            |
| Unlabeled_FAM_1017_150_F          | 5'-gagagtttactgtctctaaatgaa-3'            |
| 1017_150_R                        | 5'-aaccggaaaaagctggcattgtga-3'            |
| <b>RT-qPCR</b>                    |                                           |
| TON_1018_F                        | 5'-gttcgagaatcctgctgtctt-3'               |
| TON_1018_R                        | 5'-agcaactggcaagtctgaaatg-3'              |
| TON_1023_F                        | 5'-tgccatcttctcgctttg-3'                  |

|            |                                    |
|------------|------------------------------------|
| TON_1023_R | 5'-gctctgctatgtccattatgtattctct-3' |
| TON_1031_F | 5'-ccgtaggaaccacgatgtacttt-3'      |
| TON_1031_R | 5'-ccgtcaaatcggcaagattaa-3'        |

---

**Confirmation of mutations in coding region**

|            |                                           |
|------------|-------------------------------------------|
| TON_0536_F | 5'-aacgactatcttggcgttct-3'                |
| TON_0536_R | 5'-ccgagaacgtccagataatt-3'                |
| TON_0541_F | 5'-gacctcaacgagctgatgga-3'                |
| TON_0541_R | 5'-acaaggtagccagttgccgc-3'                |
| TON_0544_F | 5'-atgttggtggagtcccagat-3'                |
| TON_0544_R | 5'-tcacttgtaagcgggtaga-3'                 |
| TON_0711_F | 5'-tctgggggaactgtgacggg-3'                |
| TON_0711_R | 5'-ccacgacagggtttaatag-3'                 |
| TON_0820_F | 5'-acagaggtgagagagatccccgttactgatggaac-3' |
| TON_0820_R | 5'-gaaaaaagcaaaggattactctgagcttgctgg-3'   |
| TON_0982_F | 5'-aggttctctccacggaccg-3'                 |
| TON_0982_R | 5'-tgatcccacttctcatgg-3'                  |
| TON_1525_F | 5'-cggctaggataatcctcgac-3'                |
| TON_1525_R | 5'-cttgggataccttgctgga-3'                 |
| TON_1364_F | 5'-tccatctcggccttagccgg-3'                |
| TON_1364_R | 5'-acgctccaagcaccacctta-3'                |
| TON_1544_F | 5'-agtattctcgtacctgtgt-3'                 |
| TON_1544_R | 5'-caactacatctcgcgagga-3'                 |
| TON_1548_F | 5'-ctagagtgagagcagggag -3'                |
| TON_1548_R | 5'-atgaagcaccgtaaagtgtc -3'               |

|                                    |                            |
|------------------------------------|----------------------------|
| TON_1664_F                         | 5'-cgcaaggaactgtccatgg-3'  |
| TON_1664_R                         | 5'-caaactcaaagaagcctaaa-3' |
| TON_1694_F                         | 5'-tgccggctggagaaccgggg-3' |
| TON_1694_R                         | 5'-atgatcattggcctcctagc-3' |
| Long region deletion_TON_0536_in_F | 5'-agcatgtaccagcagacgat-3' |
| Long region deletion_TON_0544_R    | 5'-tcacttgtaagcgggtaga-3'  |

---

**Confirmation of mutations in non-coding region**

|                            |                            |
|----------------------------|----------------------------|
| Genome position_ 1351559_F | 5'-gggacgatgcccttgccgac-3' |
| Genome position_ 1351559_R | 5'-gatcctggtgaatgccgtaa-3' |

---

82 **Supplementary Data, File 1** Log<sub>2</sub> (fold change) values of all differentially expressed genes were arranged  
83 according to their archaeal COG affiliations. Data for genes that were not assigned to any archaeal COG  
84 category were documented on the sheet named 'genes not classified'.

85

86 **Supplementary Data, File 2** Comparison of methylation statuses of adenine and cytosine residues between the  
87 2T and 156T strains. A total of 2190 and 2105 sites in both strands of the genome were detected as N<sup>6</sup>-methyl  
88 adenine (m6A) in 2T and 156T, respectively. The sequences surrounding the modification sites were analyzed  
89 by MEME.

90
